# Supplementary material for: The Functional Role and Regulatory Mechanism of FTO m6A RNA Demethylase in Human Uterine Leiomyosarcoma
Source: MDPI journal article supplement (doi:10.3390/ijms24097957), 2023-04-27
Supplement: s1 [file s1]

Figure S1. Reactome analysis. (A) Upregulated DEGs; (B) Downregulated DEGs

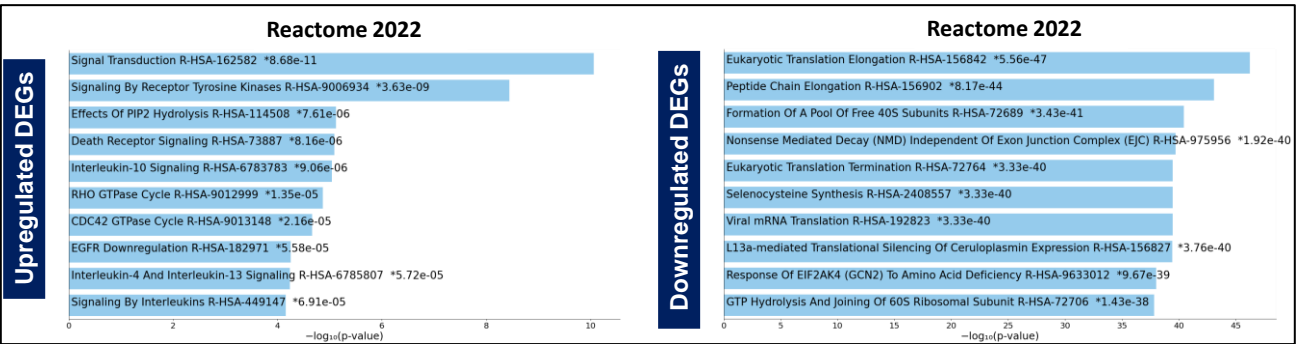

Figure S2. The expression of cell cycle-related genes and epigenetic regulators between DMSO and Dac51-treated LMS cells

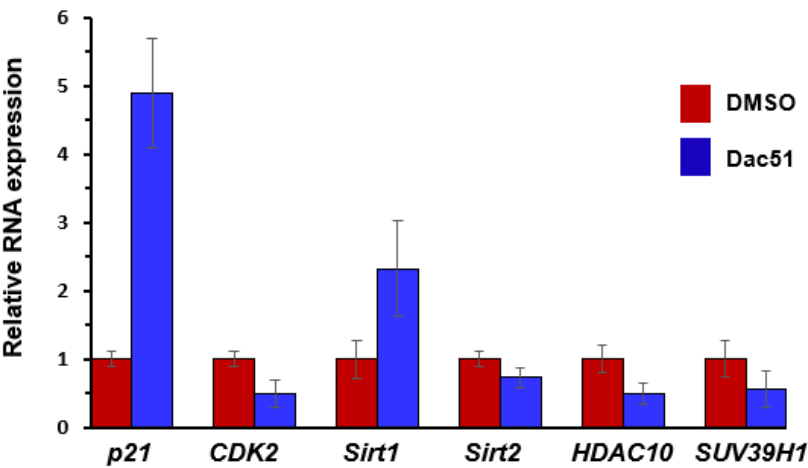

Table S1. Top 20 significant terms for ChEA of upregulated genes

| Table S1. Top 20 significantly terms for ChEA of upregulated genes |              |          |                  |                 |                |  |
|--------------------------------------------------------------------|--------------|----------|------------------|-----------------|----------------|--|
| Term                                                               | Overlap      | P-value  | Adjusted P-value | Odds Ratio      | Combined Score |  |
| NR3C1 27076634 ChIP-Seq BEAS2B Human Lung Inflammation             | 819/308<br>4 | 2.30E-76 | 1.74E-73         | 2.46626374<br>3 | 429.5341622    |  |
| SUZ12 20075857 ChIP-Seq MESCs Mouse                                | 900/361<br>1 | 6.86E-70 | 2.59E-67         | 2.28129182<br>3 | 363.3090392    |  |

|                                                            |              |          |          |                 |             |
|------------------------------------------------------------|--------------|----------|----------|-----------------|-------------|
| ZNF217 24962896 ChIP-Seq MCF-7 Human                       | 432/128<br>9 | 1.10E-67 | 2.76E-65 | 3.19470656<br>9 | 492.5660972 |
| NFKB1 27076634 ChIP-Seq BEAS2B Human Lung<br>Inflammation  | 929/382<br>3 | 1.46E-66 | 2.77E-64 | 2.20844174      | 334.775801  |
| MBD3 35695185 ChIP-Seq nicBasalRootGanglia Mouse<br>Embryo | 881/365<br>6 | 1.76E-60 | 2.67E-58 | 2.15222832<br>5 | 296.1200122 |
| LEF1 29337183 ChIP-Seq mESC Mouse Stem                     | 618/233<br>5 | 1.32E-54 | 1.67E-52 | 2.32964916<br>4 | 289.0175064 |
| TP63 23658742 ChIP-Seq EP156T Human                        | 722/293<br>7 | 3.15E-51 | 3.41E-49 | 2.13503386      | 248.2718351 |
| AR 27270436 ChIP-Seq VCaP Human Prostate Carcinoma         | 830/356<br>5 | 2.16E-49 | 2.04E-47 | 2.01417838<br>4 | 225.7050125 |
| FOXA1 27270436 ChIP-Seq VCaP Human Prostate<br>Carcinoma   | 768/333<br>1 | 2.55E-43 | 2.15E-41 | 1.95637945<br>5 | 191.8689483 |
| MTF2 20144788 ChIP-Seq MESCs Mouse                         | 614/248<br>8 | 3.49E-43 | 2.64E-41 | 2.09535536<br>1 | 204.8475143 |
| WT1 25993318 ChIP-Seq PODOCYTE Human                       | 689/290<br>9 | 2.12E-42 | 1.46E-40 | 2.00292743<br>7 | 192.1994195 |
| CJUN 26792858 Chip-Seq BT549 Human                         | 430/156<br>4 | 3.11E-41 | 1.96E-39 | 2.36012284<br>9 | 220.1322855 |
| SMARCA4 23332759 ChIP-Seq OLIGODENDROCYTES Mouse           | 531/208<br>9 | 1.17E-40 | 6.83E-39 | 2.14977617<br>8 | 197.6597557 |
| SOX2 20726797 ChIP-Seq SW620 Human                         | 499/193<br>1 | 4.31E-40 | 2.33E-38 | 2.18733589<br>5 | 198.266821  |
| CEBPD 21427703 ChIP-Seq 3T3-L1 Mouse                       | 383/134<br>9 | 6.02E-40 | 3.04E-38 | 2.44875039<br>5 | 221.1422026 |
| TCF4 23295773 ChIP-Seq U87 Human                           | 722/317<br>7 | 5.30E-38 | 2.51E-36 | 1.89508245<br>8 | 162.6561887 |
| CTCF 31629814 ChIP-Seq Hepatocytes Mouse Tyrosinemia       | 700/308<br>6 | 2.20E-36 | 9.78E-35 | 1.88111632<br>8 | 154.4518938 |
| STAT3 23295773 ChIP-Seq U87 Human                          | 619/263<br>7 | 2.65E-36 | 1.12E-34 | 1.94713930<br>9 | 159.503122  |
| PPAR 26484153 Chip-Seq NCI-H1993 Human                     | 287/945      | 2.26E-35 | 9.01E-34 | 2.64777168<br>1 | 211.2231764 |
| MITF 21258399 ChIP-Seq MELANOMA Human                      | 958/461<br>4 | 4.00E-35 | 1.51E-33 | 1.72989714<br>2 | 137.0162036 |

**Table S2. Top 20 significant terms for ChEA of downregulated genes**

| Term                                           | Overlap  | P-value  | Adjusted P-value | Odds Ratio  | Combined Score |
|------------------------------------------------|----------|----------|------------------|-------------|----------------|
| MYC 18358816 ChIP-ChIP MESCs Mouse             | 497/2369 | 9.33E-30 | 7.07E-27         | 1.925931678 | 128.7367727    |
| EGR1 20690147 ChIP-Seq ERYTHROLEUKEMIA Human   | 846/4931 | 7.37E-21 | 2.31E-18         | 1.539278579 | 71.35514076    |
| E2F1 26619117 ChIP-Seq Hepatocytes Mouse Liver | 517/2717 | 9.15E-21 | 2.31E-18         | 1.684425803 | 77.71990176    |
| XRN2 22483619 ChIP-Seq HELA Human              | 286/1296 | 4.67E-20 | 8.84E-18         | 1.973491333 | 87.84054439    |

|                                                |          |          |          |             |             |
|------------------------------------------------|----------|----------|----------|-------------|-------------|
| CCND1 20090754 ChIP-ChIP RETINA Mouse          | 314/1472 | 1.28E-19 | 1.93E-17 | 1.895293889 | 82.45616553 |
| LXR 22292898 ChIP-Seq THP-1 Human              | 335/1614 | 5.71E-19 | 7.20E-17 | 1.833691601 | 77.02846218 |
| E2F1 18555785 ChIP-Seq MESC's Mouse            | 551/3015 | 2.84E-18 | 3.08E-16 | 1.600677615 | 64.66913954 |
| MYC 19030024 ChIP-ChIP MESC's Mouse            | 524/2842 | 4.17E-18 | 3.95E-16 | 1.613054042 | 64.55039866 |
| UBF1/2 26484160 Chip-Seq HMEC-DERIVED Human    | 335/1650 | 1.88E-17 | 1.58E-15 | 1.779500773 | 68.53536042 |
| FOXP1 21924763 ChIP-Seq HESC's Human           | 583/3273 | 6.12E-17 | 4.64E-15 | 1.55167123  | 57.92632242 |
| SETDB1 19884255 ChIP-Seq MESC's Mouse          | 304/1478 | 1.16E-16 | 7.98E-15 | 1.800376411 | 66.06206696 |
| MYBL2 22936984 ChIP-ChIP MESC's Mouse          | 293/1419 | 2.62E-16 | 1.66E-14 | 1.806034902 | 64.7943337  |
| MYC 18555785 ChIP-Seq MESC's Mouse             | 196/852  | 7.29E-16 | 4.24E-14 | 2.048798002 | 71.41076091 |
| PGR 26153859 ChIP-Seq MCF-7 Human BreastCancer | 189/816  | 1.22E-15 | 6.59E-14 | 2.064659864 | 70.90334628 |
| CEBPB 24764292 ChIP-Seq MC3T3 Mouse            | 296/1461 | 2.47E-15 | 1.25E-13 | 1.761471826 | 59.24529615 |
| KLF4 18358816 ChIP-ChIP MESC's Mouse           | 257/1238 | 1.16E-14 | 5.39E-13 | 1.806719077 | 57.96753835 |
| ZFP281 18757296 ChIP-ChIP E14 Mouse            | 294/1466 | 1.21E-14 | 5.39E-13 | 1.736882539 | 55.65740933 |
| SOX9 25088423 ChIP-ChIP EMBRYONIC GONADS Mouse | 317/1619 | 2.68E-14 | 1.13E-12 | 1.688847568 | 52.78019239 |
| SA1 27219007 Chip-Seq ERYTHROID Human          | 321/1646 | 3.10E-14 | 1.21E-12 | 1.680969511 | 52.28412633 |
| MYC 19079543 ChIP-ChIP MESC's Mouse            | 218/1013 | 3.20E-14 | 1.21E-12 | 1.881686003 | 58.47173526 |

**Table S3. Top 20 significant terms for human microRNAs of upregulated genes**

| Term            | Overlap  | P-value  | Adjusted P-value | Odds Ratio  | Combined Score |
|-----------------|----------|----------|------------------|-------------|----------------|
| hsa-miR-4704-5p | 411/1869 | 5.41E-18 | 1.73E-16         | 1.706050231 | 67.83023287    |
| hsa-miR-1244    | 389/1768 | 4.54E-17 | 1.03E-15         | 1.701342684 | 64.02204636    |
| hsa-miR-21      | 412/1900 | 5.92E-17 | 1.16E-15         | 1.673141291 | 62.51669809    |
| hsa-miR-590-5p  | 412/1900 | 5.92E-17 | 1.16E-15         | 1.673141291 | 62.51669809    |
| hsa-miR-190     | 388/1779 | 2.19E-16 | 3.84E-15         | 1.680390571 | 60.58868405    |
| hsa-miR-190b    | 388/1779 | 2.19E-16 | 3.84E-15         | 1.680390571 | 60.58868405    |
| hsa-miR-3177-5p | 400/1852 | 3.61E-16 | 6.01E-15         | 1.660787866 | 59.05345505    |
| hsa-miR-331-5p  | 384/1775 | 1.21E-15 | 1.92E-14         | 1.660506423 | 57.03558631    |
| hsa-miR-208a    | 382/1772 | 2.56E-15 | 3.82E-14         | 1.651880465 | 55.50016013    |
| hsa-miR-208b    | 382/1772 | 2.56E-15 | 3.82E-14         | 1.651880465 | 55.50016013    |
| hsa-miR-4671-3p | 338/1528 | 3.27E-15 | 4.75E-14         | 1.700334355 | 56.71478181    |
| hsa-miR-1284    | 409/1931 | 4.22E-15 | 5.89E-14         | 1.618409716 | 53.56653305    |
| hsa-miR-4796-5p | 349/1626 | 9.37E-14 | 9.87E-13         | 1.633864323 | 49.01417921    |
| hsa-miR-4445    | 384/1826 | 1.02E-13 | 1.06E-12         | 1.596550852 | 47.7560986     |
| hsa-miR-1278    | 361/1703 | 2.03E-13 | 1.96E-12         | 1.608877284 | 47.01751932    |
| hsa-miR-3923    | 294/1335 | 4.54E-13 | 4.08E-12         | 1.678659342 | 47.70863868    |
| hsa-miR-584     | 385/1855 | 6.75E-13 | 5.99E-12         | 1.567999707 | 43.94165927    |
| hsa-miR-4764-3p | 403/1960 | 7.34E-13 | 6.43E-12         | 1.551681819 | 43.35425769    |
| hsa-miR-496     | 376/1812 | 1.36E-12 | 1.12E-11         | 1.565604978 | 42.78178607    |
| hsa-miR-4703-3p | 364/1749 | 2.18E-12 | 1.78E-11         | 1.569366204 | 42.13758089    |

**Table S4. Top 20 significant terms for human microRNAs of downregulated genes**

| <b>Term</b>     | <b>Overlap</b> | <b>P-value</b> | <b>Adjusted P-value</b> | <b>Odds Ratio</b> | <b>Combined Score</b> |
|-----------------|----------------|----------------|-------------------------|-------------------|-----------------------|
| hsa-miR-744     | 285/1290       | 4.62E-20       | 2.74E-17                | 1.976137202       | 87.9812621            |
| hsa-miR-3180    | 310/1475       | 2.22E-18       | 3.03E-16                | 1.855902627       | 75.4441682            |
| hsa-miR-3180-3p | 310/1475       | 2.22E-18       | 3.03E-16                | 1.855902627       | 75.4441682            |
| hsa-miR-3196    | 310/1475       | 2.22E-18       | 3.03E-16                | 1.855902627       | 75.4441682            |
| hsa-miR-4467    | 189/803        | 2.22E-16       | 2.17E-14                | 2.110011489       | 76.05359407           |
| hsa-miR-4706    | 254/1198       | 1.27E-15       | 8.50E-14                | 1.857461296       | 63.70584297           |
| hsa-miR-4749-5p | 254/1198       | 1.27E-15       | 8.50E-14                | 1.857461296       | 63.70584297           |
| hsa-miR-1908    | 359/1849       | 1.37E-15       | 8.50E-14                | 1.682233064       | 57.5737493            |
| hsa-miR-663     | 359/1849       | 1.37E-15       | 8.50E-14                | 1.682233064       | 57.5737493            |
| hsa-miR-4532    | 319/1622       | 1.19E-14       | 6.75E-13                | 1.699560419       | 54.49828206           |
| hsa-miR-4281    | 362/1918       | 7.17E-14       | 3.77E-12                | 1.619724615       | 49.02193599           |
| hsa-miR-4508    | 232/1106       | 8.19E-14       | 3.99E-12                | 1.82340882        | 54.94562036           |
| hsa-miR-4707-5p | 232/1113       | 1.65E-13       | 7.04E-12                | 1.808153148       | 53.22074772           |
| hsa-miR-4734    | 201/934        | 3.45E-13       | 1.37E-11                | 1.875535157       | 53.81960003           |
| hsa-miR-4738-5p | 193/887        | 3.61E-13       | 1.37E-11                | 1.900298224       | 54.44502528           |
| hsa-miR-3141    | 189/879        | 1.98E-12       | 7.13E-11                | 1.869086672       | 50.36525419           |
| hsa-miR-1538    | 213/1027       | 2.92E-12       | 9.50E-11                | 1.789849636       | 47.53769596           |
| hsa-miR-4745-3p | 213/1027       | 2.92E-12       | 9.50E-11                | 1.789849636       | 47.53769596           |
| hsa-miR-4640-3p | 332/1809       | 3.44E-11       | 1.07E-09                | 1.552261432       | 37.39888678           |
| hsa-miR-1292    | 354/1959       | 5.15E-11       | 1.53E-09                | 1.525440327       | 36.13764101           |

**Table S5. Primers used in the study**

| <b>Gene symbol</b> | <b>Primer sequences</b> | <b>F or R</b> | <b>Assay</b> | <b>Species</b> | <b>Size (bp)</b> | <b>Accession</b> |
|--------------------|-------------------------|---------------|--------------|----------------|------------------|------------------|
| HDAC10             | CCTGAGGGGAGGAGACAGAA    | F             | q-PCR        | Human          | 101              | AF426160.1       |
| HDAC10             | TCCCATCTAAGAGGTACAGGAG  | R             | q-PCR        | Human          | 101              |                  |
| Sirt1              | AGAACCCATGGAGGATGAAAG   | F             | q-PCR        | Human          | 111              | AF083106.2       |
| Sirt1              | TCATCTCCATCAGTCCCAAATC  | R             | q-PCR        | Human          | 111              |                  |
| Sirt2              | GGACAACAGAGAGGGAGAAAC   | F             | q-PCR        | Human          | 120              | AY030277.1       |
| Sirt2              | AGACAAGAACTGCTGGTTAAGA  | R             | q-PCR        | Human          | 120              |                  |
| SUV39H1            | CGAGGAGCTCACCTTTGATTAC  | F             | q-PCR        | Human          | 122              | NM_001282166.2   |
| SUV39H1            | CAATACGGACCCGCTTCTTAG   | R             | q-PCR        | Human          | 122              |                  |
| CDKN1A             | CGGAACAAGGAGTCAGACATT   | F             | q-PCR        | Human          | 105              | NM_000389.5      |
| CDKN1A             | AGTGCCAGGAAAGACAACACTAC | R             | q-PCR        | Human          | 105              |                  |
| CDK2               | AGATGGACGGAGCTTGTTATC   | F             | q-PCR        | Human          | 103              | X62071           |
| CDK2               | CTTGGTCACATCCTGGAAGAA   | R             | q-PCR        | Human          | 103              |                  |
| 18S                | CACGGACAGGATTGACAGATT   | F             | q-PCR        | Human          | 119              | NR_145820        |
| 18S                | GCCAGAGTCTCGTTCGTTATC   | R             | q-PCR        | Human          | 119              |                  |
